# Supplementary material
Source: PubMed Central journal article supplement (PMC4256055)
Supplement: NIHMS639441-supplement-supplement.pdf [file NIHMS639441-supplement-supplement.pdf]

# Clustering South African Households Based on their Asset Status Using Latent Variable Models.

Damien McParland, Isobel Claire Gormley,  
Tyler H. McCormick, Samuel J. Clark,  
Chodziwadziwa Whiteson Kabudula and Mark A. Collinson.

**Additional tSSPR sensitivity analysis,  
Bayesian latent residual plots  
and tables of results.**

# 1 tSSPR sensitivity analysis

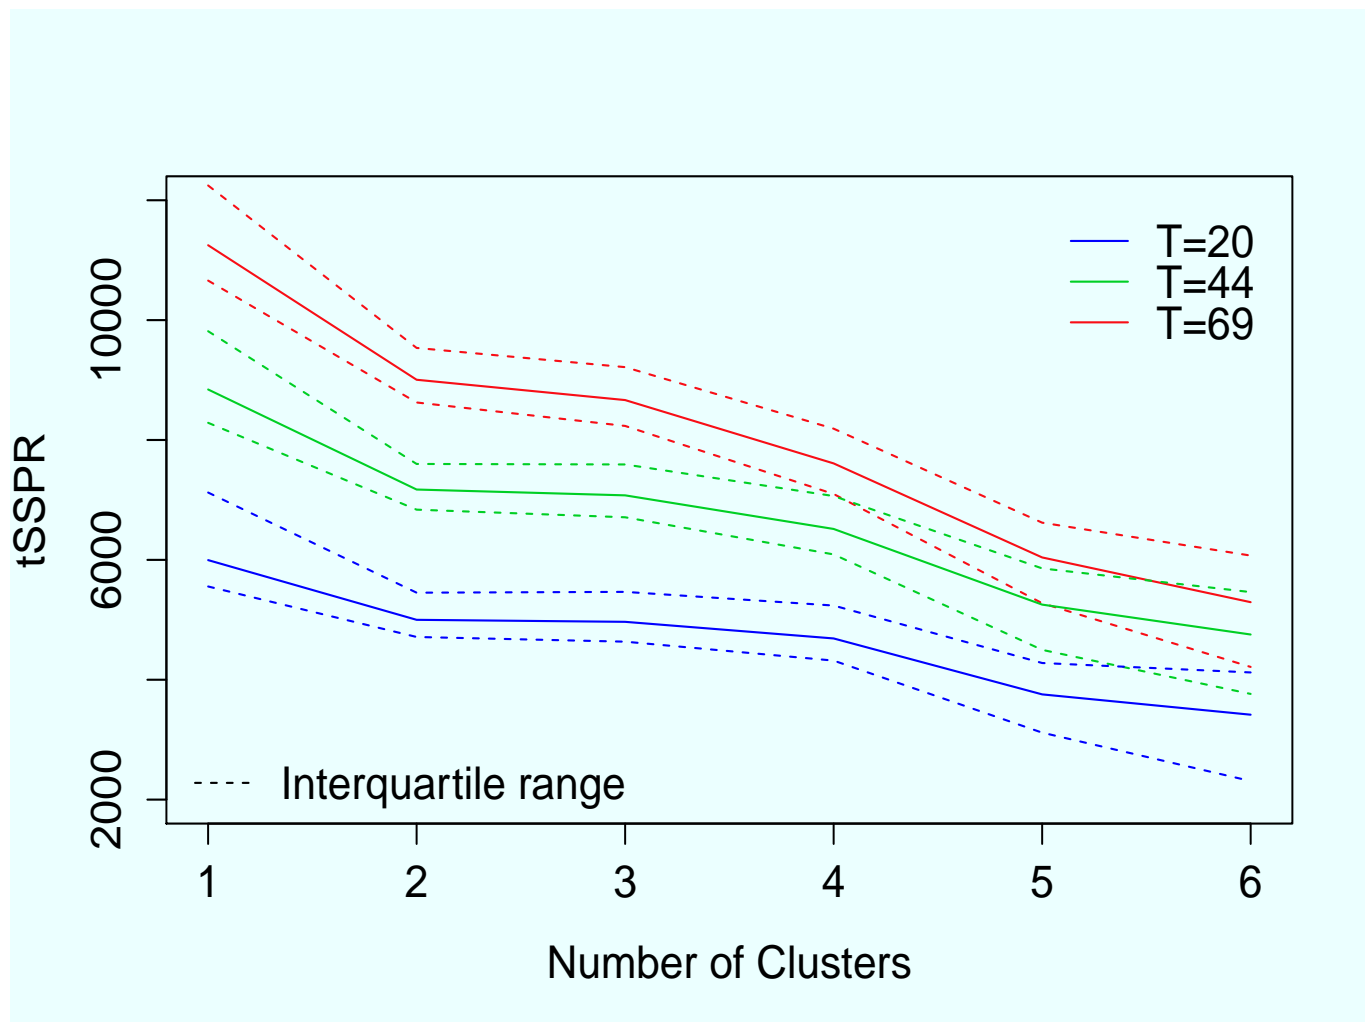

Figure 1: The median tSSPR, for different truncation levels  $T$ , across a range of MFA-MD models where  $Q = 1$ . The associated uncertainty is also illustrated. Truncation level  $T = 20$  corresponds to response patterns observed 30 times or more in the observed data set,  $T = 44$  corresponds to response patterns observed 20 times or more and  $T = 69$  corresponds to response patterns observed 15 times or more. The same model fit message is suggested by all truncation levels, i.e. that models with  $G = 2, 3, 4$  fit equally well, and that fit improves as  $G$  increases. This suggests the exploratory tSSPR approach is insensitive to the truncation level used in this case.

## 2 Bayesian latent residual plots

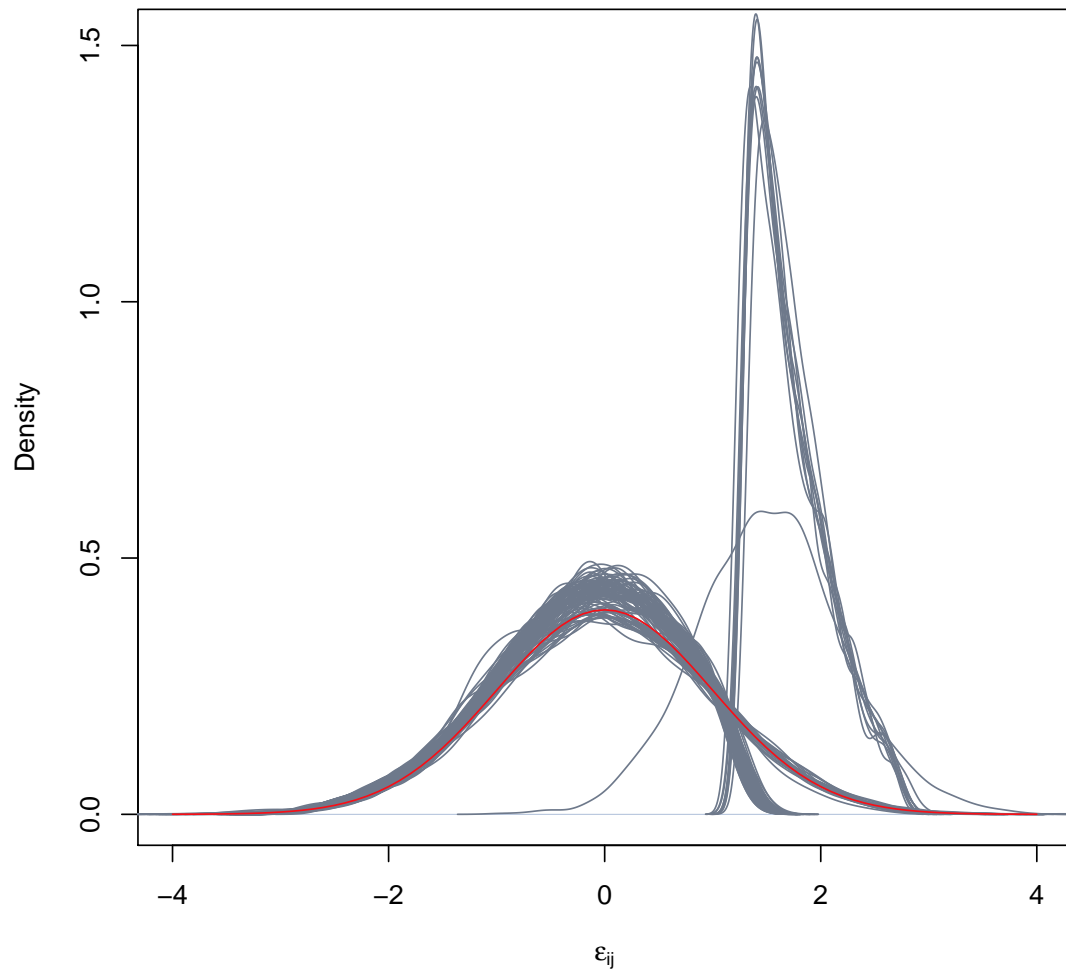

Figure 2: Bayesian latent residuals for the ordinal *ToiletType* item under the  $G = 3$  and  $q = 1$  model.

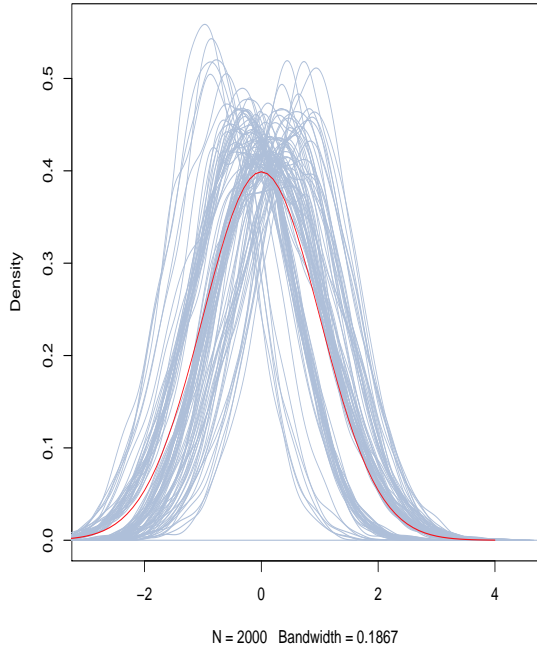

(a) Bayesian latent residuals for the first latent dimension.

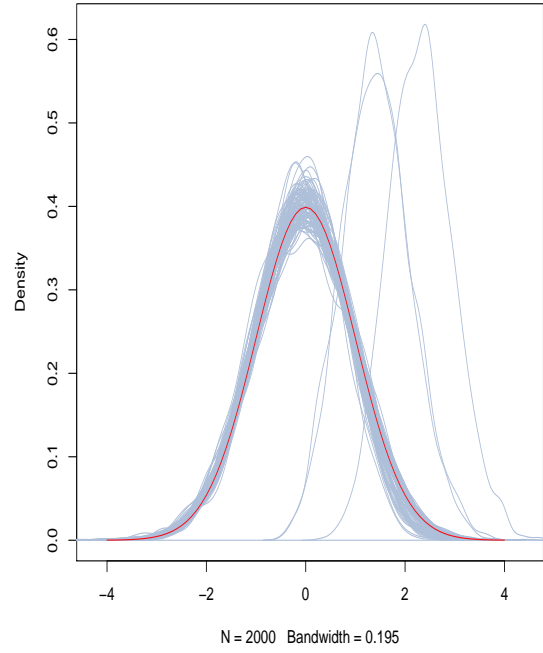

(b) Bayesian latent residuals for the second latent dimension.

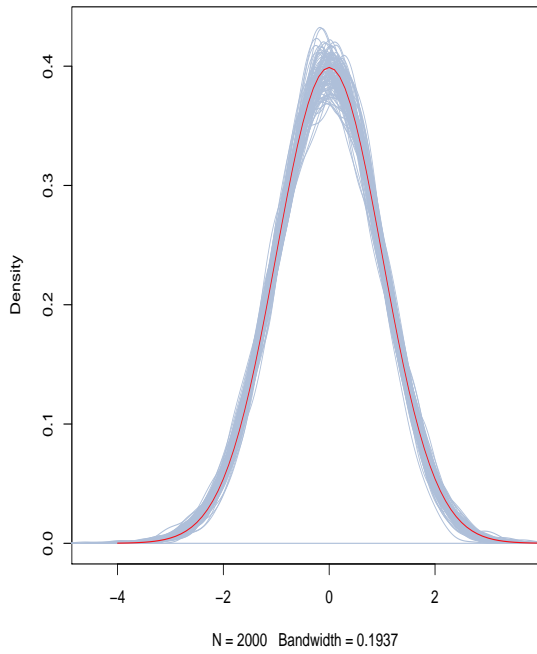

(c) Bayesian latent residuals for the third latent dimension.

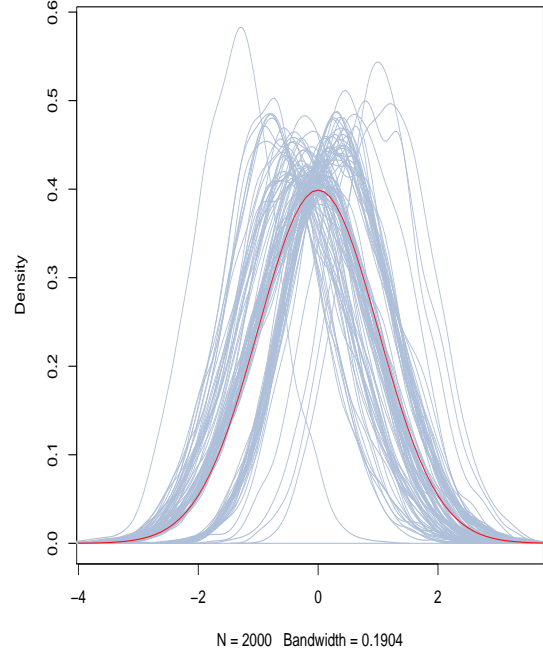

(d) Bayesian latent residuals for the fourth latent dimension.

Figure 3: Bayesian latent residuals for the nominal *PowerCook* item under the  $G = 3$  and  $q = 1$  model.

### 3 Modal responses under the $G=4$ and $G=2$ MFA-MD models (with $q=1$ ).

Table 1: The cardinality of each group under the 4 component model and the modal response to items on which the modal response differs across groups.

| $G$                      | 1        | 2        | 3        | 4       |
|--------------------------|----------|----------|----------|---------|
| #                        | 6862     | 6505     | 2259     | 1991    |
| Dwelling Under Construct | No       | No       | Yes      | No      |
| # Bedrooms               | 2        | 2        | 1        | 1       |
| Separate Kitchen         | Yes      | Yes      | No       | Yes     |
| Separate Living Area     | Yes      | Yes      | No       | No      |
| Toilet Facilities        | Yard     | Yard     | Bush     | Bush    |
| Toilet Type              | Pit      | Pit      | None     | None    |
| Power for Cooking        | Electric | Wood     | Wood     | Wood    |
| Power for Lighting       | Electric | Electric | Electric | Candles |
| Stove                    | Yes      | No       | Yes      | No      |
| Fridge                   | Yes      | Yes      | Yes      | No      |
| TV                       | Yes      | Yes      | Yes      | No      |
| Video                    | Yes      | No       | Yes      | No      |
| CellPhone                | Yes      | Yes      | Yes      | No      |
| Poultry                  | No       | Yes      | No       | No      |

Table 2: The cardinality of each group under the 2 component model and the modal response to items on which the modal response differs across groups.

| $G$                  | 1        | 2    |
|----------------------|----------|------|
| #                    | 9261     | 8356 |
| Separate Living Area | Yes      | No   |
| Power for Cooking    | Electric | Wood |
| Stove                | Yes      | No   |
| Fridge               | Yes      | No   |
| TV                   | Yes      | No   |
| Video                | Yes      | No   |
